# Supplementary material for: Stunted Growth Caused by Blast Disease in Rice Seedlings Is Associated with Changes in Phytohormone Signaling Pathways
Source: PubMed Central journal article supplement (PMC5592330; doi:10.3389/fpls.2017.01558), 2017-09-06
Supplement: Table_1.pdf [file Table_1.pdf]

## *Supplementary Material*

### **Stunted growth caused by blast disease in rice seedlings is associated with disturbed phytohormone balance**

**Chang-Jie Jiang<sup>1, \*</sup>, Xiao-Long Liu<sup>2</sup>, Hui Zhang<sup>2</sup>, Ying-Jie Yu<sup>2</sup> and Zheng-Wei Liang<sup>2, \*</sup>**

\* **Correspondence:** Corresponding Author: [cjjiang@affrc.go.jp](mailto:cjjiang@affrc.go.jp); [liangzw@neigae.ac.cn](mailto:liangzw@neigae.ac.cn)

#### Supplementary Tables

**Supplementary Table 1:** Genes and primer sequences used for qRT-PCR analysis.

| Gene name<br>(RAP-DB ID)          | Primer sequences (5'→3')                           | References                                                                       |
|-----------------------------------|----------------------------------------------------|----------------------------------------------------------------------------------|
| <i>Rubq1</i><br>(Os06g0681400)    | GGAGCTGCTGCTGTTCTAGG<br>TTCAGACACCATCAAACCAGA      | Plant Sci. (2000) 28: 201-11.<br>doi: 10.1016/S0168-9452(00)00255-7              |
| <i>JAmyb</i><br>(Os11g0684000)    | TAGGGGTTCAAAGAGGACCA<br>TCCTCAGTGCAATTCTGGAG       | MPMI (2001) 14: 527-35.<br>doi: 10.1094/MPMI.2001.14.4.527                       |
| <i>OMT</i><br>(Os11g0303600)      | TCGAGCGAGAGGAGCATGAA<br>ACCTAGCACTGGTGTGATTTGTAG   | Plant J. (2010) 61: 804-15.<br>doi: 10.1111/j.1365-313X.2009.04107.x             |
| <i>SalT</i><br>(Os01t0348900)     | CGAAATAATGTTCCATGGTGT<br>TGACTACGGATCGGTGCAA       | Plant Physiol. (2003) 133: 1755-67.<br>doi: 10.1104/pp.103.025742                |
| <i>OsWsi18</i><br>(Os01g0705200)  | TCACTTCAAATTCGGTGCAA<br>CACACCCGTCAGAAATCCTC       | Plant Cell Physiol. (1998) 39: 64-72.<br>doi: 10.1093/oxfordjournals.pcp.a029290 |
| <i>OsARF1</i><br>(Os11g0523800)   | GATGGTGCTTGTCTTGGTG<br>CGGCTGACAACCTACCTCAC        | Plant Mol. Biol. (2002) 50: 415-25.<br>doi: 10.1023/A:1019818110761              |
| <i>OsIAA9</i><br>(Os02g0805100)   | GAAGGAGATGCATGCGTGAG<br>CATACATCAGTGCACACCCA       | Func. Integr. Genomics (2006) 6: 47-59.<br>doi: 10.1007/s10142-005-0005-0        |
| <i>OsGA2ox1</i><br>(Os03g0856700) | TGGCGATTATTTTCAGTTCCTAGC<br>CGGCCGGGATAGATTAGATAGA | Physiol. Plant (1997) 99: 111-8.<br>doi: 10.1111/j.1399-3054.1997.tb03438.x      |
| <i>OsGA2ox3</i><br>(Os01g0757200) | CCACGAGAAGATGAAGCTGC<br>AACCTGGCTGTACATTGTGC       | J. Plant Res. (2003) 116: 161-4.<br>doi: 10.1007/s10265-003-0080-z               |
| <i>OsCESA5</i><br>(Os03g0837100)  | ATCTGCCGTCTGGAATAGAG<br>ACCCACTCATCTCCAGTGTT       | Front. Microbiol. (2014) 5: 1-9.<br>doi: 10.3389/fmicb.2014.00026                |
| <i>OsCESA6</i><br>(Os07g0252400)  | CCATATATGCGGTGATACGA<br>CTTCCTCCTTCTGTCCAAA        | Front. Microbiol. (2014) 5: 1-9.<br>doi: 10.3389/fmicb.2014.00026                |
| <i>OsCSLA9</i><br>(Os06g0625700)  | GTGTGCAAGTGCAAAGTTTC<br>GGTGAGCATATTGAGGAACC       | Front. Microbiol. (2014) 5: 1-9.<br>doi: 10.3389/fmicb.2014.00026                |
| <i>OsEXP1</i><br>(Os04t0228400)   | GTGTCCTTCTTCGTCTTCGT<br>ACTCCTCCATTACACCCAAA       | Front. Microbiol. (2014) 5: 1-9.<br>doi: 10.3389/fmicb.2014.00026                |
| <i>OsEXP15</i><br>(Os03g0155700)  | CGTCGTGGTAGTTGCAGTAG<br>TGCATTAATACTCCCGCATA       | Front. Microbiol. (2014) 5: 1-9.<br>doi: 10.3389/fmicb.2014.00026                |
| <i>OsNPR1</i><br>(Os01t0194300)   | TCCTCCTGGAGCTACTCACC<br>TCTGCGTTTCACAATTGACG       | Plant Mol. Biol. (2010) 74: 549-62.<br>doi: 10.1007/s11103-010-9695-3            |
| <i>WRKY45</i><br>(Os05g0322900)   | CGGGTAAACGATCGAAAGA<br>GCTGAGACGACACATCAACAA       | Plant Cell (2007) 19: 2064-76.<br>doi: 10.1105/tpc.106.046250                    |
| <i>OsPR1b</i><br>(Os01g0382000)   | ACGGGCGTACGTACTGGCTA<br>CTCGGTATGGACCGTGAAG        | BBRC (2000) 278: 290-8.<br>doi: 10.1006/bbrc.2000.3781                           |
| <i>PBZ1</i><br>(Os12g0555000)     | GCGTTTGAGTCCGTGAGAGT<br>TCACCCATTGATGAAGCAAA       | Biosci. Biotech. Biochem. (2001) 65: 205-8.<br>doi: 10.1271/bbb.65.205           |

**Supplementary Table 2:** Contents of JA and ABA in the 6<sup>th</sup> leaf of rice seedlings after inoculation with blast fungus *M. oryzae* (race 007.0)<sup>a</sup>

|     | Con      | Blast    | Blast-c  |
|-----|----------|----------|----------|
| JA  | 131 ± 27 | 182 ± 66 | 155 ± 73 |
| ABA | 37 ± 2   | 40 ± 21  | 32 ± 6   |

<sup>a</sup>Rice seedlings at four-leaf stage were blast-inoculated (Blast), and half of them was subjected to cutting of the inoculated 4<sup>th</sup> leaf blades at 2-dpi (Blast-c). Whole 6<sup>th</sup> leaf from the seedlings was collected at 3-dpi. Con: mock control. Values are represented as mean ± standard deviation in picomoles per gram of fresh weight (n = 4 biological replicates).

## Supplementary Figures

A

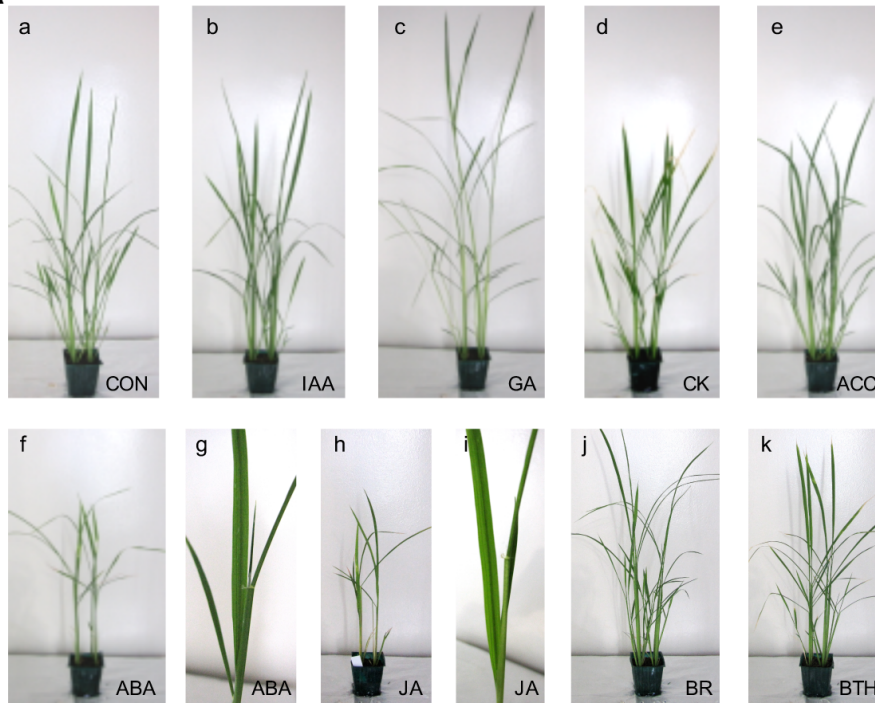

B

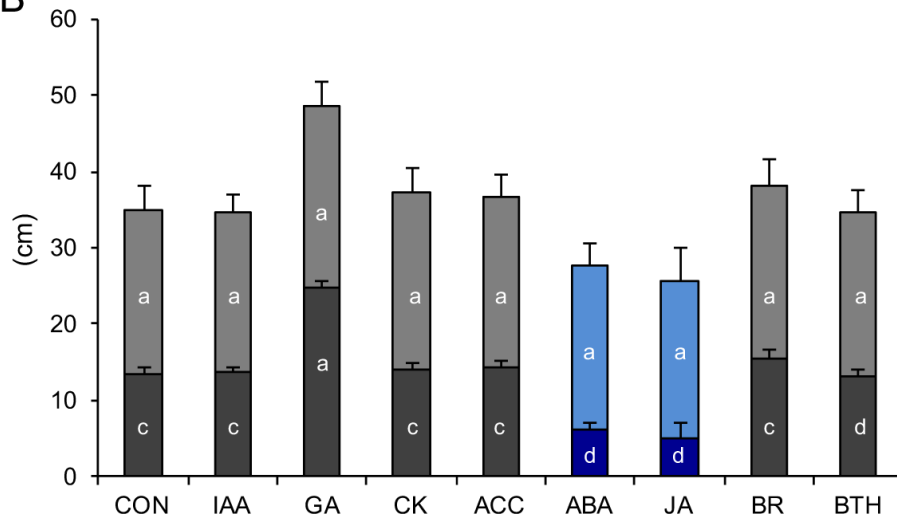

**Supplementary Figure 1.** Effect of exogenous phytohormones on rice seedling growth. Rice seedlings at four-leaf stage were treated with each indicated phytohormone by root drenching, and leaf lengths of the 5<sup>th</sup> leaf from each treatment were measured 4 weeks after the onset of treatments. (A) Image of rice seedlings treated with exogenous phytohormones. (B) Lengths of leaf blades (upper columns) and leaf sheaths (bottom columns) of the 5<sup>th</sup> leaf. Values are the means  $\pm$  standard errors; different letters above bars indicate a significant difference ( $P < 0.05$ ) based on Duncan's test.
